# Supplementary material for: Probing into the theory of impact sensitivity: propelling the understanding of phonon–vibron coupling coefficients
Source: Royal Society of Chemistry journal article supplement (doi:10.1039/d3cp06083g), 2024-01-01
Supplement: d3cp06083g1.pdf [file d3cp06083g1.pdf]

## Supplementary Material

- 1
- 2 1. The relationship between the phonon-vibron coupling coefficients and impact
- 3 sensitivity based on the classification criteria.

4 Considering that molecular structure influences the impact sensitivity of energetic

5 materials, based on the classification criteria in Figure S1 (according to molecular

6 symmetry, types of functional groups, etc.), these 45 energetic explosives were divided

7 into two groups: the group A comprises 30 energetic molecules, and the group B

8 consists of 15 energetic molecules. Firstly, energetic materials are classified into two

9 broad categories depending on whether they include the ring structures. For energetic

10 materials with the ring structures, they are subdivided into groups based on the other

11 rings and the benzene rings. For energetic materials that do not contain the benzene

12 ring, compounds with triazinane are classified as group B, while compounds containing

13 cyclohexane or a five-membered heterocycle are classified as group A. Those with the

14 benzene rings are further divided based on whether they contain additional types of

15 rings. Energetic materials with the benzene rings and other types of rings are assigned

16 to group A if they include triazole or pyridine, and to group B if they include pyrazole.

17 For energetic materials with the benzene rings but no other types of rings, those lacking

18 the center symmetry are categorized into group A, and those with a center symmetry

19 into group B. For energetic materials without the ring structure, they are categorized

20 into two groups based on the specific types of functional groups contained in their

21 molecules. Those with nitro groups connected by oxygen or nitrogen (O-NO<sub>2</sub> or N-

22 NO<sub>2</sub>) belong to one group, while those with nitro groups connected only by carbon (C-

23 NO<sub>2</sub>) fall into another group. Among the energetic materials with nitro groups linked

24 by oxygen or nitrogen (O-NO<sub>2</sub> or N-NO<sub>2</sub>), those with a molecular structure that is

25 centrally symmetric are placed in group B, and those with a non-centrally symmetric

26 molecular structure are placed in group A. Compounds with nitro groups connected

27 solely by carbon (C-NO<sub>2</sub>) are further divided into three groups based on the number of

28 carbon atoms in the molecule. Compounds with 1 to 3 carbon atoms constitute one

29 group, those with 4 to 7 carbon atoms another group, and those with exactly 8 carbon

atoms form a third group. For energetic materials with 1 to 3 carbon atoms, those containing the -CH<sub>3</sub> (methyl) functional group are assigned to group A, while those with the -OH (hydroxyl) functional group are assigned to group B. For energetic materials with 4 to 7 carbon atoms, if the ratio (the number of nitro groups on carbon atoms connected to nitro groups compared to the sum of -CH<sub>3</sub> and -CH<sub>2</sub> (methyl and methylene) groups) is less than 1, these materials are categorized into group A; if the ratio is equal to 1, they are categorized into group B. For energetic materials with 8 carbon atoms, if each carbon atom connected to a nitro group is also connected to at least two nitro groups, then these materials belong to group A. If each carbon atom connected to a nitro group is attached to fewer than two nitro groups, then these materials are classified into group B. "N<sub>NO2</sub>" denotes the number of nitro groups. Their molecular structures and chemical formulas are illustrated in Figure S2 (group A) and Figure S3 (group B). The chemical name, molecular formula, isomeric SMILES, phonon-vibron coupling coefficients ( $\zeta \times 10^4$ ) and impact sensitivity (H<sub>50</sub>) of group A and group B energetic materials are shown in Table S4 and Table S5. The computed frequencies (cm<sup>-1</sup>) in 0-700cm<sup>-1</sup> for group A and group B energetic materials are shown in Table S6 and Table S7.

Different functional relationships are provided for the dependency between coupling factors and impact sensitivity for the two groups of energetic molecules. The obtained |R| values are depicted in the histograms of a two-dimensional array in Figures S4(a) and (b). As displayed in Figure S5 (a) and (b), both coupling coefficients and impact sensitivity exhibit a high correlation. For the group A energetic materials, the correlation coefficient is 0.88, and for the group B, the correlation coefficient is 0.89. This also reaffirms the need to consider the impact of chemical structure when studying the impact sensitivity of energetic materials.

55

56

57

58

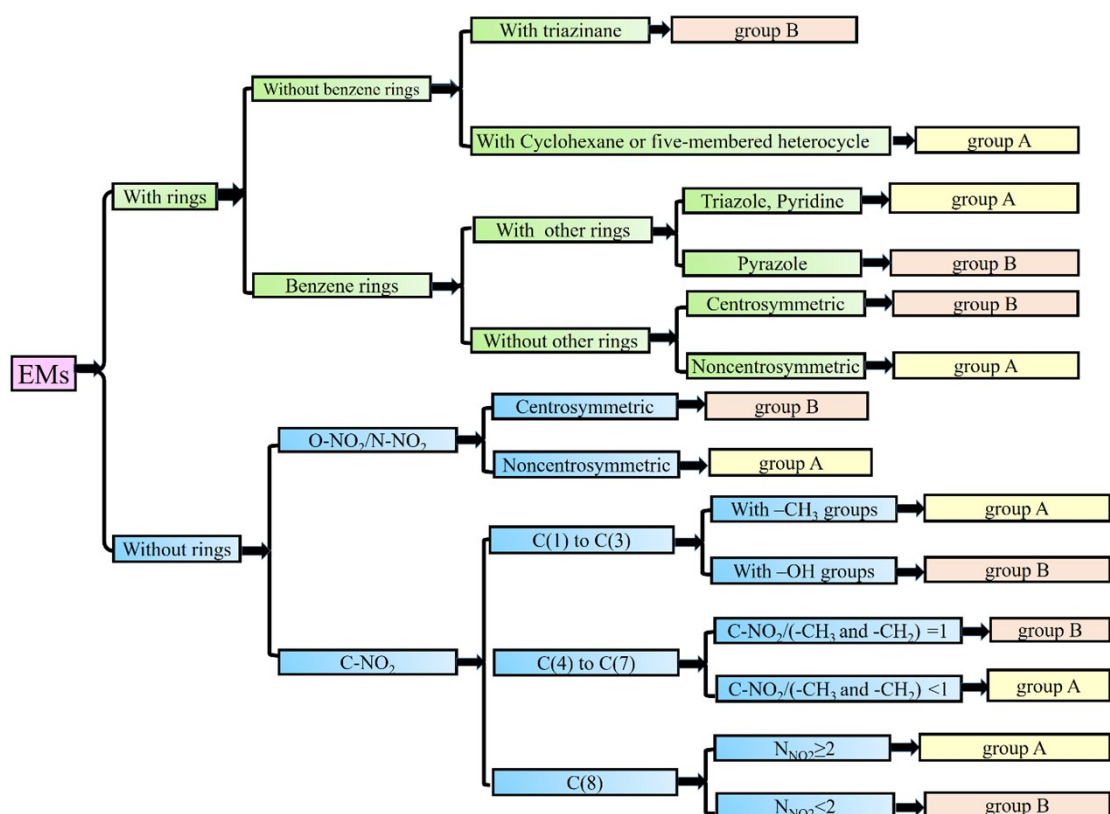

59 Figure S1. Classify energetic materials based on features such as structure, symmetry,  
 60 number of carbon atoms, and functional groups.

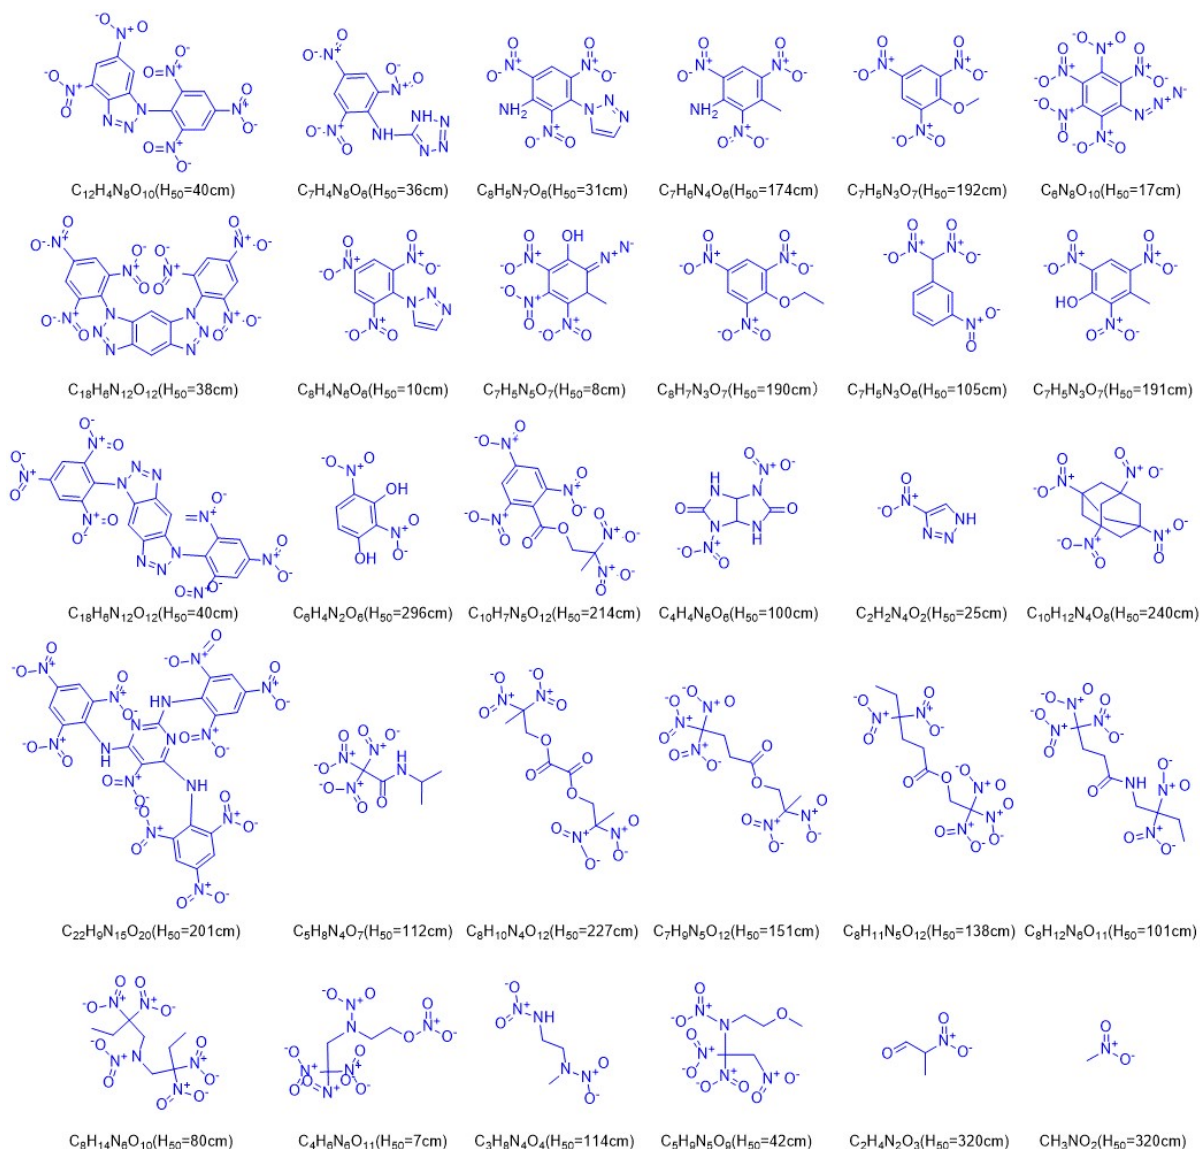

78 Figure S2. The molecular structures, molecular formulas, and impact sensitivity ( $H_{50}$ )  
 79 of group A energetic materials.

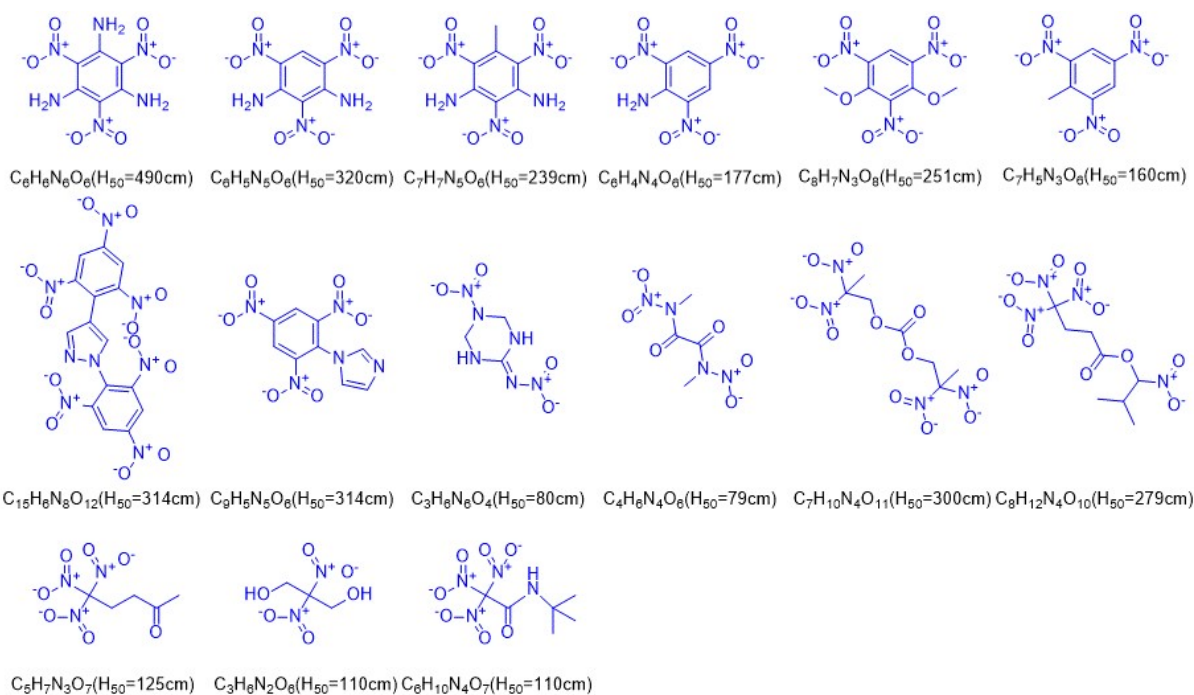

93 Figure S3. The molecular structures, molecular formulas, and impact sensitivity values  
 94 of group B energetic materials.

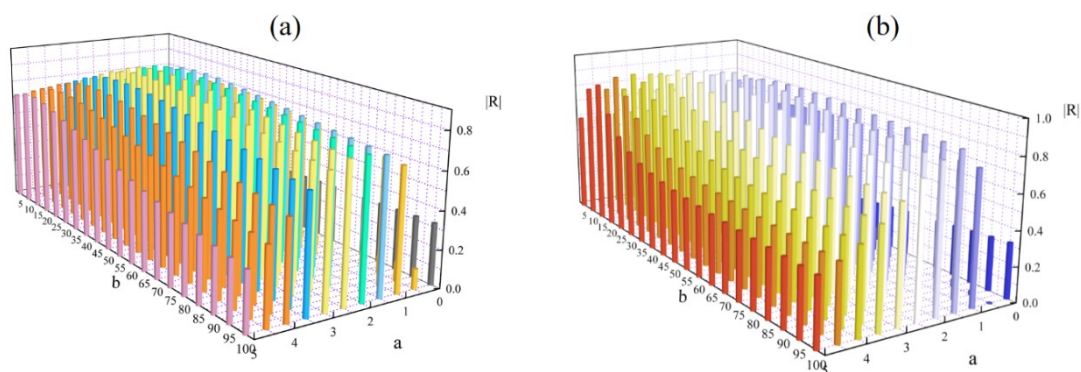

119  
 120  
 121 Figure S4. (a) The relationship between  $|R|$  and both damping factors  $a$  and  $b$  for the  
 122 first set of energetic materials; (b) The relationship between  $|R|$  and both damping  
 123 factors  $a$  and  $b$  for the second set of energetic materials.

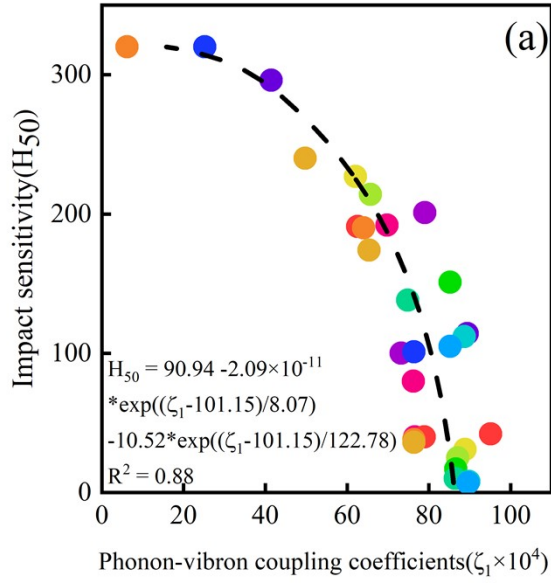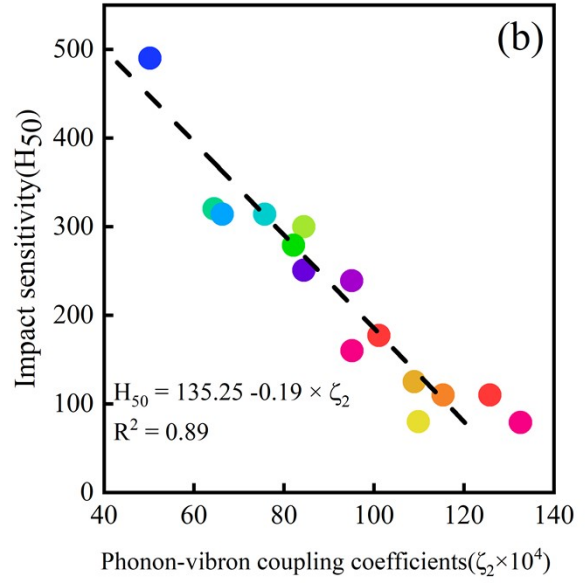

Figure S5. (a) The relationship between  $\zeta_1$  and impact sensitivity  $H_{50}$  for the first set of energetic materials; (b) The relationship between  $\zeta_2$  and impact sensitivity  $H_{50}$  for the second set of energetic materials.
