# Supplementary material for: Probing into the theory of impact sensitivity: propelling the understanding of phonon–vibron coupling coefficients
Source: Royal Society of Chemistry journal article supplement (doi:10.1039/d3cp06083g), 2024-01-01
Supplement: d3cp06083g2.xlsx [file d3cp06083g2.xlsx]

## Sheet: Table S1
Table S1 The computed frequencies (cm–1) in 0-700cm-1 for 45 energetic materials.
C12H4N8O10	C7H4N8O6	C8H5N7O6	C7H6N4O6	C7H5N3O7	C6N8O10	C18H6N12O12	C8H4N6O6	C7H5N5O7	C8H7N3O7	C7H5N3O6	C7H5N3O7	C18H6N12O12	C6H4N2O6	C10H7N5O12	C4H4N6O6	C2H2N4O2	C10H12N4O8	C22H9N15O20	C5H8N4O7	C8H10N4O12	C7H9N5O12	C8H11N5O12	C8H12N6O11	C8H14N6O10	C4H6N6O11	C3H8N4O4	C5H9N5O9	C2H4N2O3	CH3NO2	C6H6N6O6	C6H5N5O6	C7H7N5O6	C6H4N4O6	C8H7N3O8	C7H5N3O6	C15H6N8O12	C9H5N5O6	C3H6N6O4	C4H6N4O6	C7H10N4O11	C8H12N4O10	C5H7N3O7	C3H6N2O6	C6H10N4O7
22.56	31.6	37.21	47.5	48.7	22.72	12.62	39.88	32.94	37.76	27.85	44.65	29.96	39.27	20.57	42.81	67.25	33.77	8.87	41.81	12.99	13.19	18.08	7.33	20.85	21.1	37.3	37.56	37.63	15.39	32.54	42.72	48.09	44.76	45.44	48.22	14.89	39.36	25.45	43.96	14.88	19.7	21.52	48.71	43.39
25.06	47.42	44.35	51.3	52.94	36.33	20.15	42.97	60.74	47.46	40.5	51.37	37.22	73.82	24.43	67.65	207.75	36.2	13.61	48.86	27.73	25.13	21.13	25.42	33.99	23.77	51.61	38.76	178.06	476.8	33.13	57.19	49.85	53.66	49.51	50.81	17.35	42.36	57.29	59.87	15.35	26.12	26.53	72.55	50.85
26.72	50.59	52.37	62.72	58.24	37.64	20.16	48.39	70.21	53.6	42.93	56.85	49.03	114.41	25.51	74.49	222.76	37.34	17.03	57.28	33.45	29.24	28.13	28.99	44.88	35.38	61.26	41.94	218.74	593.48	52.46	60.57	72.68	57.55	53.14	54.23	20.85	48.27	82.37	80.15	26.25	33.75	42.22	138.87	58.46
29.08	54.2	65.35	89.2	62.29	49.74	29.39	58.23	76.76	66.24	52.45	91.17	49.67	130.06	42.78	84.97	424.49	40.13	19.08	60.58	37.89	35.6	38.31	37.78	51.87	42.31	95.14	61.54	233.28	648.98	70.3	93.52	85.66	96.47	63.27	91.48	33.84	50.34	133.42	100.31	35.87	35.75	53.13	162.86	85.8
48.18	80.25	85.91	105.62	93.94	58.07	33.37	78.91	77.74	74.45	80.75	102.05	50.32	201.84	47.52	93.93	524.6	116.99	20.99	89.89	48.13	37.93	48.74	43.06	58.45	55.92	113.19	70.18	258.72		96.37	108.21	96.44	123.41	67.1	114.71	39.95	73.69	155.39	146.49	47.05	38.57	87.03	192.93	113.94
49.66	87.6	93.31	134.41	124.92	72.16	48.07	90.99	113.03	108.51	104.92	132.89	54.84	238.67	50.93	143.12	600.43	119.43	33.38	108.51	54.54	47.07	50.68	52.5	70.57	73.67	134.62	75.99	369.51		96.68	142.7	111.43	155.08	87.73	145.85	48.25	82.87	195.97	156.41	51.83	49.24	99.79	200.01	122.17
51.97	117.07	104.99	186.47	148	80.16	49.35	104.12	124.02	120.58	164.07	168.26	68.24	281.46	56.15	161.87	648.13	139.76	34.97	143.58	59.9	48.81	54.05	59.91	81.33	84.47	150.87	83.89	462.64		97.36	194.09	178.66	202.83	107	165.15	49.18	101.67	227.6	166.72	59.18	63.86	124.88	234.47	139.21
70.37	135.76	119.97	203.97	171.67	84.49	50.99	145.96	128.89	143.63	174.08	206.03	71.7	327.54	62.13	202.48		142.41	37.53	154.02	60.89	75.18	61.9	63.32	92.01	92.14	273.78	101.59	559.04		281.16	255.94	219.17	213.03	123.77	175.06	50.59	144.06	265.89	177.17	61.95	82.14	163.06	280.78	150.44
80.2	164.22	172.75	221.81	176.92	113.64	55.88	170.16	165.02	152.83	241.94	219.01	76.68	353.77	81.2	216.79		144.35	43.19	187.36	77.01	80.43	68.82	74.22	104.51	105.16	310.06	116.88	687.25		281.47	276.36	225.33	316.69	159.94	192.42	61.06	162.57	314.87	178.83	65.19	86.08	177.86	295.22	180.07
109.64	186.3	192.07	252.47	199.61	126.17	66.46	174.19	175.63	175.01	262.25	256.69	82.16	383.01	95.05	300.57		218.23	47.48	208.51	86.01	92.04	79.05	82.14	106.26	116.74	317.92	142.65			301.16	319.41	259.21	331.52	162.3	281.11	69.09	170.63	342.39	229.5	102.74	93.33	183.65	363.73	202.25
114.31	191.15	207.8	300.36	244.47	150.9	74.78	187.37	200.94	197.22	322.26	281.44	97.48	415.51	114.07	327.09		225.12	50	219.59	92.18	98.93	82.62	97.9	121.85	134.72	379.33	173.82			301.38	329.94	272.51	341.25	177.13	313.03	84.46	186.79	407.36	242.73	138.93	118	186.52	369.09	214.92
124.43	224.11	259.34	327.68	275.08	160.32	76.01	257.29	214.17	253.2	332.07	321.63	109.54	444.79	123.58	422.97		225.89	53.61	226.82	136.08	127.33	105.85	116.27	126.81	156.46	410.56	180.06			347.84	351.45	291.63	350.66	206.52	325.31	88.26	257.34	491.63	300.51	154.51	160.51	249.7	430.49	228.58
139.98	271.98	266.78	334.15	308.08	176.55	76.21	287.29	255.52	264.46	391.1	325.84	126.43	460.27	150.2	449.62		294.19	64.94	245.39	151.47	154.46	120.37	144.66	153.89	169.43	465.58	182.93			347.88	376.6	341.56	379.35	224.38	345.04	92.16	278.53	529.04	316.12	173.07	181.24	288.2	459.54	241.19
152.3	291.52	311.3	355.36	321.54	179.69	89.9	312.3	273.66	292.66	406.23	357.63	137.1	493.59	154.54	451.65		312.3	73.9	272.06	165.69	159.67	149.52	161.84	158.42	182.19	597.97	227.79			370.66	379.4	344.48	405.16	242.16	357.43	106.47	311.58	574.55	337.8	183.45	181.97	291.57	563.1	275.67
166.44	323.85	327.95	370.61	337.91	189.78	108.69	330.8	275.79	311.16	429.3	379.28	147.53	579.37	171.44	469.42		315.34	75.54	305.58	172.48	176.93	159.48	166.73	168.56	195.76	603.57	230.65			390.81	426.29	360.19	457.55	264.72	382.92	128.71	323.8	614.6	353.05	210.36	188.74	350.51	574.28	304.67
173.18	338.19	339.77	405.35	363.32	194.38	118.63	342.37	300.95	322.07	505.45	414.36	151.52	608.09	179.87	532.38		318.44	76.51	334.19	184.44	186.58	179	181.64	189.3	226.84	676.87	235.39			418.33	426.49	374.85	477.05	274	453.18	145.32	338.88	669.13	368.73	239.27	204.2	368.43	675.92	327.22
199.67	360.44	351.21	418.96	396.11	214.48	124.62	372.06	331.72	346.17	520.62	427.28	160.32	629.25	186.46	536.75		347.49	80.32	340.43	211.13	191.24	181.99	188.11	189.69	238.63		257.03			442.51	462.11	423.29	532.46	294.8	468.21	148.91	366.14		459.24	245.9	229.45	397.44	683.32	348.12
211.25	384.59	390.29	447.68	417.77	252.57	149.28	414.89	351.81	363.03	562.78	453.59	165.8	654.25	228.64	591.56		348.1	82.86	345.93	222.42	237.47	192.52	196.49	200.66	252.71		305.45			442.89	479.76	428.81	539.28	305.37	526.76	157.53	419.08		478.62	254.97	241.12	405.37		353.73
241.98	410.35	405.73	488.99	524.23	254.21	153.67	487.66	359.72	417.79	588.24	477.32	171.17	695.92	233.4	639.88		363.92	92.36	377.11	238.89	244.07	207.14	203.86	220.89	319.88		322.23			482.71	505.02	438.08	622.71	322.15	533.17	161.79	489.74		566.7	260.74	256.7	496.31		362.26
286.29	444.06	420.22	502.42	534.12	270.61	157.23	524.01	388.86	472.06	661.57	513.98	172.78		239.56	678.11		391.25	97.51	394.04	241.93	255.13	210.65	221.3	225.41	339.79		343.82			506.16	642.21	477.23	646.57	357.81	641.65	169.05	523.04		600.21	288.84	301.08	527.6		370.41
306.83	512.98	468.47	571.06	549.64	274.83	166.07	537.16	401.63	496.27	675.75	579.83	182.46		276.28	697.84		403.16	102.78	447.81	258.96	277.2	237.47	244.07	241.58	358.77		369.73			506.21	657.97	503.3	687.31	399.07	647.66	173.59	536.08			301.64	307.5	556.27		384.29
312.95	531.07	502.09	591.77	620.46	290.9	172.52	595.78	449.76	530.26		642.51	222.4		288.31			437.42	113.69	508.15	293.54	300.59	265.08	250.55	258.89	362.68		384.93			608.91	658.56	555.35		408.24	694.74	196.73	590.19			310.1	310.46	604.91		390.78
325.11	556.66	576.62	648.77	678.04	304.36	173.36	617.68	458.34	545.41		661.92	225.84		317.78			466.3	117.8	558.16	310.52	305.62	299.64	293.77	309.34	392.49		402.33			646.95	674.34	591.78		457.02		210.07	615.86			326.4	320.26	640.48		420.69
335.41	584.11	600.3	659.26		349.54	185.36	623.32	491.32	636.21		688.94	250.35		322.72			496.35	123.43	574.53	319.23	314.92	309.29	300.14	319.4	424.14		439.68			647.1	679.74	614.08		499.47		269.47	622.36			348.61	341.94			451.41
346.79	624.92	613.23	685.49		390.72	214.88	686.37	523.4	672.95			253.15		324.24			522.86	125.43	607.67	320.31	326.08	340.77	310.46	329.91	428.68		467.72			684.44	682.35	626.4		548.66		291.72	645.83			363.89	354.76			482.23
354.96	673.24	621.11			432.63	229.63		586.13				298.4		327.32			540.71	134.05	664.73	333.2	356.14	349.57	334.2	333.06	518.09		541.48			697.1		632.09		609.68		294.1				367.87	363.62			540.64
371.11	695.1	651.48			485.22	247.28		611				307.89		359.28			542.62	143.89	679.52	367.64	367.27	350.33	350.09	352.73	555.55		568.63			697.33		654.58		623.25		309.3				415.16	364.63			573.83
401.19		684.49			497.44	272.84		642.18				311.71		369.06			585.71	146.88		375.14	375.32	356.87	358.45	360.38	582.4		607.42					685.96		667.83		311.1				417.62	400.29			584.54
426.21		693.38			505.36	290.9		653.61				312.13		408.58			684.73	155.38		388.2	395.74	370.25	362.64	367.55	624.4		618.05					689.97		692.68		315.77				481.82	425.36			655.06
445.41					548.7	310.37		690.38				333.66		417.86			690.94	156.95		408.11	411.86	377.35	394.61	426.03	631.94		682.6					694.6				336.21				493.6	471.67			682.75
485.77					651.6	312.18						335.37		432.34				163.02		416.03	474.53	401.74	407.83	430.82	662.31											344.5				528.17	508.66
505.49					680.19	313.37						345.79		453.17				180.67		442.53	503.19	436.03	428.28	440.01	679.4											350.98				544.97	515.33
524.72						333.23						365.38		491.49				186.61		484.24	512.27	464.61	476.7	489.65												368.47				582.91	577.68
534.48						336.35						366.67		528.12				188.65		499.52	558.42	486.37	488.94	491.85												372.69				627.4	615.75
567.56						346.48						379.86		549.29				192		542.51	573.87	527.74	519.09	552.47												417.03				653.99	632.84
572.85						368.18						388.43		560.08				197.82		572.73	617.48	542.68	548.04	559.26												452.02				675.53	656.69
605.67						369.92						420.53		593.73				202.55		600.85	626.68	578.09	571.03	591.22												472.82					693.34
637.83						377.98						422.3		597.8				203.52		637.42	646.48	618.52	602.33	613.34												493.31
654.86						404.5						433.83		617.22				228.06		686.55	674.4	629.17	621.14	650.45												521.12
673.79						414.29						436.66		677.88				251.23				650.37	648.07	680.08												527.12
						417.81						449.2						264.31					652.93													533.12
						431.34						493.69						271.04					692.22													546.87
						438.29						495.9						289.73																		563.63
						447.94						526.48						300.44																		603.18
						481.75						527.58						313.77																		627.64
						500.12						542.91						316.82																		631.73
						525.62						545.91						320.6																		651.02
						527.98						598.57						322.91																		671.78
						539.87						599.17						327.58
						554.71						614.59						333.18
						600.59						619.23						342.4
						602.95						644.38						349.34
						612.99						648.66						353.94
						623.87												359.93
						642.02												370.79
						651.23												374.08
																		376.26
																		396.13
																		399.96
																		402.27
																		430.05
																		448.87
																		454.35
																		467.94
																		500.19
																		506.14
																		508.96
																		528.66
																		531.45
																		532.81
																		533.99
																		540.4
																		544.7
																		567.64
																		594.47
																		621.88
																		628.8
																		639.77
																		652.01
																		659.19
																		664.15
																		673.75
																		681.48
																		695.26

## Sheet: Table S2
Table S2 The calculated absolute values of Pearson correlation coefficient |R| using different damping factors represented by a and b for 45 energetic materials..
	a=0	a=0.5	a=1	a=1.5	a=2	a=2.5	a =3	a=3.5	a=4	a =4.5	a=5
b=5	0.16	0	0.25	0.36	0.39	0.4	0.4	0.39	0.39	0.38	0.37
b=10	0.16	0.03	0.31	0.41	0.44	0.45	0.45	0.44	0.44	0.43	0.43
b=15	0.15	0.06	0.38	0.46	0.49	0.49	0.49	0.48	0.47	0.45	0.43
b=20	0.16	0.07	0.43	0.51	0.52	0.52	0.51	0.5	0.47	0.42	0.37
b=25	0.16	0.08	0.47	0.54	0.55	0.54	0.52	0.49	0.44	0.37	0.31
b=30	0.16	0.08	0.49	0.55	0.56	0.55	0.52	0.47	0.41	0.33	0.27
b=35	0.17	0.07	0.5	0.56	0.562	0.55	0.51	0.45	0.38	0.31	0.24
b=40	0.17	0.06	0.51	0.56	0.56	0.54	0.5	0.43	0.36	0.28	0.23
b=45	0.18	0.05	0.51	0.56	0.56	0.53	0.48	0.41	0.34	0.27	0.21
b=50	0.19	0.03	0.51	0.56	0.56	0.53	0.47	0.4	0.32	0.26	0.21
b=55	0.19	0.02	0.5	0.55	0.55	0.52	0.46	0.39	0.31	0.25	0.2
b=60	0.2	0.01	0.5	0.55	0.55	0.51	0.45	0.38	0.3	0.24	0.19
b=65	0.2	0	0.49	0.54	0.54	0.51	0.44	0.37	0.3	0.24	0.19
b=70	0.2	0.02	0.48	0.54	0.53	0.5	0.44	0.36	0.29	0.23	0.19
b=75	0.21	0.03	0.48	0.53	0.53	0.49	0.43	0.35	0.28	0.23	0.18
b=80	0.21	0.04	0.47	0.53	0.52	0.49	0.42	0.35	0.28	0.22	0.18
b=85	0.21	0.05	0.46	0.52	0.52	0.48	0.42	0.34	0.27	0.22	0.18
b=90	0.22	0.06	0.46	0.52	0.51	0.48	0.41	0.34	0.27	0.22	0.18
b=95	0.22	0.07	0.45	0.51	0.51	0.47	0.41	0.33	0.27	0.22	0.18
b=100	0.22	0.08	0.45	0.51	0.5	0.47	0.4	0.33	0.27	0.21	0.18

## Sheet: Table S3
Table S3 The chemical name, molecular formula, isomeric SMILES, phonon-vibron coupling coefficients(ζ×104) and impact sensitivity(H50) of 45 energetic materials.
Chemical name	Molecular formula	Isomeric SMILES	Phonon-vibron coupling coefficients(ζ)	Impact sensitivity(H50)	Heat of explosion (Q)
4,6-dinitro-1-(2,4,6-trinitrophenyl)benzotriazole	C12H4N8O10	C1=C(C=C(C2=C1N(N=N2)C3=C(C=C(C=C3[N+](=O)[O-])[N+](=O)[O-])[N+](=O)[O-])[N+](=O)[O-])[N+](=O)[O-]	71.17	40	5.46
N-(2,4,6-trinitrophenyl)-2H-tetrazol-5-amine	C7H4N8O6	C1=C(C=C(C(=C1[N+](=O)[O-])NC2=NNN=N2)[N+](=O)[O-])[N+](=O)[O-]	71.43	36	5.22
2,4,6-trinitro-3-(triazol-1-yl)aniline	C8H5N7O6	C1=CN(N=N1)C2=C(C=C(C(=C2[N+](=O)[O-])N)[N+](=O)[O-])[N+](=O)[O-]	84.2	31	5.17
3-Methyl-2,4,6-trinitroaniline	C7H6N4O6	NC1=C([N+]([O-])=O)C=C([N+]([O-])=O)C(C)=C1[N+]([O-])=O	61.67	174	4.87
2,4,6-trinitroanisole	C7H5N3O7	COC1=C(C=C(C=C1[N+](=O)[O-])[N+](=O)[O-])[N+](=O)[O-]	63.58	192	5.19
1-azido-2,3,4,5,6-pentanitrobenzene	C6N8O10	C1(=C(C(=C(C(=C1[N+](=O)[O-])[N+](=O)[O-])[N+](=O)[O-])[N+](=O)[O-])[N+](=O)[O-])N=[N+]=[N-]	83.35	17	6.65
1,7-bis(2,4,6-trinitrophenyl)triazolo[4,5-f]benzotriazole	C18H6N12O12	C1=C(C=C(C(=C1[N+](=O)[O-])N2C3=CC4=C(C=C3N=N2)N=NN4C5=C(C=C(C=C5[N+](=O)[O-])[N+](=O)[O-])[N+](=O)[O-])[N+](=O)[O-])[N+](=O)[O-]	71.43	38	5.27
1-(2,4,6-trinitrophenyl)triazole	C8H4N6O6	C1=CN(N=N1)C2=C(C=C(C=C2[N+](=O)[O-])[N+](=O)[O-])[N+](=O)[O-]	82.07	10	5.46
6-Diazo-5-methyl-2,3,4-trinitro-2,4-cyclohexadien-1-ol	C7H5N5O7	OC1C([N+]([O-])=O)=C([N+]([O-])=O)C([N+]([O-])=O)=C(C)C1=[N+]=[N-]	85.01	8	5.55
1-Ethoxy-2,4,6-trinitrobenzene	C8H7N3O7	O=[N+](C1=C(OCC)C([N+]([O-])=O)=CC([N+]([O-])=O)=C1)[O-]	59.44	190	4.91
1-dinitromethyl-3-nitrobenzene	C7H5N3O6	C1=CC(=CC(=C1)[N+](=O)[O-])C([N+](=O)[O-])[N+](=O)[O-]	80.68	105	5.23
2,4,6-trinitro-m-cresol	C7H5N3O7	CC1=C(C(=C(C=C1[N+](=O)[O-])[N+](=O)[O-])O)[N+](=O)[O-]	58.65	191	4.78
3,7-bis(2,4,6-trinitrophenyl)triazolo[4,5-f]benzotriazole	C18H6N12O12	C1=C(C=C(C(=C1[N+](=O)[O-])N2C3=CC4=C(C=C3N=N2)N(N=N4)C5=C(C=C(C=C5[N+](=O)[O-])[N+](=O)[O-])[N+](=O)[O-])[N+](=O)[O-])[N+](=O)[O-]	74.4	40	5.27
2,4-dinitroresorcinol	C6H4N2O6	C1=CC(=C(C(=C1[N+](=O)[O-])O)[N+](=O)[O-])O	37.12	296	4.14
2',2'-dinitropropyl-2,4,6-trinitrobenzoate	C10H7N5O12	O=C(OCC([N+]([O-])=O)([N+]([O-])=O)C)C1=C([N+]([O-])=O)C=C([N+]([O-])=O)C=C1[N+]([O-])=O	61.81	214	5.01
3,6-dinitro-1,3a,4,6a-tetrahydroimidazo[4,5-d]imidazole-2,5-dione	C4H4N6O6	C12C(NC(=O)N1[N+](=O)[O-])N(C(=O)N2)[N+](=O)[O-]	69.72	100	4.6
4-nitro-2H-triazole	C2H2N4O2	C1=NNN=C1[N+](=O)[O-]	76.92	25	5.56
1,3,5,7-Tetranitroadamantane	C10H12N4O8	C1C2(CC3(CC1(CC(C2)(C3)[N+](=O)[O-])[N+](=O)[O-])[N+](=O)[O-])[N+](=O)[O-]	45.02	240	4.58
5-nitro-2,4,6-tris-(picrylamino)-pyrimidine	C22H9N15O20	[O-][N+](C1=CC([N+]([O-])=O)=CC([N+]([O-])=O)=C1NC2=C([N+]([O-])=O)C(NC3=C([N+]([O-])=O)C=C([N+]([O-])=O)C=C3[N+]([O-])=O)=NC(NC4=C([N+]([O-])=O)C=C([N+]([O-])=O)C=C4[N+]([O-])=O)=N2)=O	74.12	201	5.09
N-(2-propyl)-trinitroacetamide	C5H8N4O7	O=C(NC(C)C)C([N+]([O-])=O)([N+]([O-])=O)[N+]([O-])=O	84.73	112	5.09
bis-(2,2-dinitropropyl)-oxalate	C8H10N4O12	O=C(OCC([N+]([O-])=O)([N+]([O-])=O)C)C(OCC([N+]([O-])=O)([N+]([O-])=O)C)=O	58.23	227	4.45
2,2-dinitropropyl 4,4,4-trinitrobutanoate	C7H9N5O12	O=C(OCC([N+]([O-])=O)([N+]([O-])=O)C)CCC([N+]([O-])=O)([N+]([O-])=O)[N+]([O-])=O	80.19	151	5.25
2,2,2-trinitroethyl-4,4-dinitrohexanoate	C8H11N5O12	CCC([N+]([O-])=O)([N+]([O-])=O)CCC(OCC([N+]([O-])=O)([N+]([O-])=O)[N+]([O-])=O)=O	69.63	138	5.13
2,2-dinitrobutyl-4,4,4-trinitrobutyramide	C8H12N6O11	O=C(NCC([N+]([O-])=O)([N+]([O-])=O)CC)CCC([N+]([O-])=O)([N+]([O-])=O)[N+]([O-])=O	71.31	101	5.13
N-(2,2-dinitrobutyl)-N-2,2-trinitro-1-butanamine	C8H14N6O10	CCC([N+]([O-])=O)([N+]([O-])=O)CN(CC([N+]([O-])=O)([N+]([O-])=O)CC)[N+]([O-])=O	70.21	80	5.56
2-[nitro(2,2,2-trinitroethyl)amino]ethyl nitrate	C4H6N6O11	C(CO[N+](=O)[O-])N(CC([N+](=O)[O-])([N+](=O)[O-])[N+](=O)[O-])[N+](=O)[O-]	84.68	7	6.56
N-methyl-N-(2-nitramidoethyl)nitramide	C3H8N4O4	CN(CCN[N+](=O)[O-])[N+](=O)[O-]	82.92	114	5.32
Trinitroethyl-2-methoxy-ethylnitramine	C5H9N5O9	O=[N+]([O-])N(C([N+]([O-])=O)([N+]([O-])=O)C[N+]([O-])=O)CCOC	90.3	42	5.88
Nitromethane	CH3NO2	C[N+](=O)[O-]	5.92	320	5.44
N-methyl-N-nitroformamide	C2H4N2O3	CN(C=O)[N+](=O)[O-]	21.12	320	4.5
1,3,5-Triamino-2,4,6-trinitrobenzene	C6H6N6O6	O=[N+](C1=C(N)C([N+]([O-])=O)=C(N)C([N+]([O-])=O)=C1N)[O-]	46.28	490	4.42
1,3-diamino-2,4,6-trinitrobenzene	C6H5N5O6	O=[N+](C1=C(N)C([N+]([O-])=O)=C(N)C([N+]([O-])=O)=C1)[O-]	59.32	320	4.65
1-Methyl-3,5-diamino-2,4,6-trinitrobenzene	C7H7N5O6	O=[N+](C1=C(C)C([N+]([O-])=O)=C(N)C([N+]([O-])=O)=C1N)[O-]	90.87	239	4.63
2,4,6-Trinitroaniline	C6H4N4O6	C1=C(C=C(C(=C1[N+](=O)[O-])N)[N+](=O)[O-])[N+](=O)[O-]	101.14	177	4.98
1,3-Dimethoxy-2,4,6-trinitrobenzene	C8H7N3O8	O=[N+](C1=C(OC)C([N+]([O-])=O)=C(OC)C([N+]([O-])=O)=C1)[O-]	79.32	251	5
2,4,6-trinitrotoluene	C7H5N3O6	CC1=C([N+]([O-])=O)C=C([N+]([O-])=O)C=C1[N+]([O-])=O	88.42	160	5.2
1,4-dipicrylpyrazole	C15H6N8O12	[O-][N+](C1=CC([N+]([O-])=O)=CC([N+]([O-])=O)=C1C2=CN(C3=C([N+]([O-])=O)C=C([N+]([O-])=O)C=C3[N+]([O-])=O)N=C2)=O	71.17	314	5.41
1-picrylimidazole	C9H5N5O6	[O-][N+](C1=CC([N+]([O-])=O)=CC([N+]([O-])=O)=C1N2C=CN=C2)=O	62.08	314	5.11
N-(5-nitro-1,3,5-triazinan-2-ylidene)nitramide	C3H6N6O4	O=[N+](/N=C1NCN([N+]([O-])=O)CN\1)[O-]	105.51	80	5.17
N,N'-dimethyl-N,N'-dinitrooxamide	C4H6N4O6	O=C(N(C)[N+]([O-])=O)C(N(C)[N+]([O-])=O)=O	125.29	79	4.8
bis-(2,2-dinitropropyl)-carbonate	C7H10N4O11	O=C(OCC([N+]([O-])=O)([N+]([O-])=O)C)OCC([N+]([O-])=O)([N+]([O-])=O)C	80.49	300	4.6
2-methyl-1-nitropropyl 4,4,4-trinitrobutanoate	C8H12N4O10	O=C(OC([N+]([O-])=O)C(C)C)CCC([N+]([O-])=O)([N+]([O-])=O)[N+]([O-])=O	78.03	279	4.77
5,5,5-trinitropentan-2-one	C5H7N3O7	CC(CCC([N+]([O-])=O)([N+]([O-])=O)[N+]([O-])=O)=O	103.11	125	5.29
2,2-dinitro-1,3-propane-diol	C3H6N2O6	OCC([N+]([O-])=O)([N+]([O-])=O)CO	112.92	110	4.51
N-(t-butyl)-trinitroacetamide	C6H10N4O7	O=C(NC(C)(C)C)C([N+]([O-])=O)([N+]([O-])=O)[N+]([O-])=O	110.19	110	4.91

## Sheet: Table S4
Table S4 The chemical name, molecular formula, isomeric SMILES, phonon-vibron coupling coefficients(ζ×104) and impact sensitivity(H50) of group A energetic materials.
Chemical name	Molecular formula	Isomeric SMILES	Phonon-vibron coupling coefficients(ζ)	Impact sensitivity(H50)
4,6-dinitro-1-(2,4,6-trinitrophenyl)benzotriazole	C12H4N8O10	C1=C(C=C(C2=C1N(N=N2)C3=C(C=C(C=C3[N+](=O)[O-])[N+](=O)[O-])[N+](=O)[O-])[N+](=O)[O-])[N+](=O)[O-]	71.17	40
N-(2,4,6-trinitrophenyl)-2H-tetrazol-5-amine	C7H4N8O6	C1=C(C=C(C(=C1[N+](=O)[O-])NC2=NNN=N2)[N+](=O)[O-])[N+](=O)[O-]	71.43	36
2,4,6-trinitro-3-(triazol-1-yl)aniline	C8H5N7O6	C1=CN(N=N1)C2=C(C=C(C(=C2[N+](=O)[O-])N)[N+](=O)[O-])[N+](=O)[O-]	84.2	31
3-Methyl-2,4,6-trinitroaniline	C7H6N4O6	NC1=C([N+]([O-])=O)C=C([N+]([O-])=O)C(C)=C1[N+]([O-])=O	61.67	174
2,4,6-trinitroanisole	C7H5N3O7	COC1=C(C=C(C=C1[N+](=O)[O-])[N+](=O)[O-])[N+](=O)[O-]	63.58	192
1-azido-2,3,4,5,6-pentanitrobenzene	C6N8O10	C1(=C(C(=C(C(=C1[N+](=O)[O-])[N+](=O)[O-])[N+](=O)[O-])[N+](=O)[O-])[N+](=O)[O-])N=[N+]=[N-]	83.35	17
1,7-bis(2,4,6-trinitrophenyl)triazolo[4,5-f]benzotriazole	C18H6N12O12	C1=C(C=C(C(=C1[N+](=O)[O-])N2C3=CC4=C(C=C3N=N2)N=NN4C5=C(C=C(C=C5[N+](=O)[O-])[N+](=O)[O-])[N+](=O)[O-])[N+](=O)[O-])[N+](=O)[O-]	71.43	38
1-(2,4,6-trinitrophenyl)triazole	C8H4N6O6	C1=CN(N=N1)C2=C(C=C(C=C2[N+](=O)[O-])[N+](=O)[O-])[N+](=O)[O-]	82.07	10
6-Diazo-5-methyl-2,3,4-trinitro-2,4-cyclohexadien-1-ol	C7H5N5O7	OC1C([N+]([O-])=O)=C([N+]([O-])=O)C([N+]([O-])=O)=C(C)C1=[N+]=[N-]	85.01	8
1-Ethoxy-2,4,6-trinitrobenzene	C8H7N3O7	O=[N+](C1=C(OCC)C([N+]([O-])=O)=CC([N+]([O-])=O)=C1)[O-]	59.44	190
1-dinitromethyl-3-nitrobenzene	C7H5N3O6	C1=CC(=CC(=C1)[N+](=O)[O-])C([N+](=O)[O-])[N+](=O)[O-]	80.68	105
2,4,6-trinitro-m-cresol	C7H5N3O7	CC1=C(C(=C(C=C1[N+](=O)[O-])[N+](=O)[O-])O)[N+](=O)[O-]	58.65	191
3,7-bis(2,4,6-trinitrophenyl)triazolo[4,5-f]benzotriazole	C18H6N12O12	C1=C(C=C(C(=C1[N+](=O)[O-])N2C3=CC4=C(C=C3N=N2)N(N=N4)C5=C(C=C(C=C5[N+](=O)[O-])[N+](=O)[O-])[N+](=O)[O-])[N+](=O)[O-])[N+](=O)[O-]	74.4	40
2,4-dinitroresorcinol	C6H4N2O6	C1=CC(=C(C(=C1[N+](=O)[O-])O)[N+](=O)[O-])O	37.12	296
2',2'-dinitropropyl-2,4,6-trinitrobenzoate	C10H7N5O12	O=C(OCC([N+]([O-])=O)([N+]([O-])=O)C)C1=C([N+]([O-])=O)C=C([N+]([O-])=O)C=C1[N+]([O-])=O	61.81	214
3,6-dinitro-1,3a,4,6a-tetrahydroimidazo[4,5-d]imidazole-2,5-dione	C4H4N6O6	C12C(NC(=O)N1[N+](=O)[O-])N(C(=O)N2)[N+](=O)[O-]	69.72	100
4-nitro-2H-triazole	C2H2N4O2	C1=NNN=C1[N+](=O)[O-]	76.92	25
1,3,5,7-Tetranitroadamantane	C10H12N4O8	C1C2(CC3(CC1(CC(C2)(C3)[N+](=O)[O-])[N+](=O)[O-])[N+](=O)[O-])[N+](=O)[O-]	45.02	240
5-nitro-2,4,6-tris-(picrylamino)-pyrimidine	C22H9N15O20	[O-][N+](C1=CC([N+]([O-])=O)=CC([N+]([O-])=O)=C1NC2=C([N+]([O-])=O)C(NC3=C([N+]([O-])=O)C=C([N+]([O-])=O)C=C3[N+]([O-])=O)=NC(NC4=C([N+]([O-])=O)C=C([N+]([O-])=O)C=C4[N+]([O-])=O)=N2)=O	74.12	201
N-(2-propyl)-trinitroacetamide	C5H8N4O7	O=C(NC(C)C)C([N+]([O-])=O)([N+]([O-])=O)[N+]([O-])=O	84.73	112
bis-(2,2-dinitropropyl)-oxalate	C8H10N4O12	O=C(OCC([N+]([O-])=O)([N+]([O-])=O)C)C(OCC([N+]([O-])=O)([N+]([O-])=O)C)=O	58.23	227
2,2-dinitropropyl 4,4,4-trinitrobutanoate	C7H9N5O12	O=C(OCC([N+]([O-])=O)([N+]([O-])=O)C)CCC([N+]([O-])=O)([N+]([O-])=O)[N+]([O-])=O	80.19	151
2,2,2-trinitroethyl-4,4-dinitrohexanoate	C8H11N5O12	CCC([N+]([O-])=O)([N+]([O-])=O)CCC(OCC([N+]([O-])=O)([N+]([O-])=O)[N+]([O-])=O)=O	69.63	138
2,2-dinitrobutyl-4,4,4-trinitrobutyramide	C8H12N6O11	O=C(NCC([N+]([O-])=O)([N+]([O-])=O)CC)CCC([N+]([O-])=O)([N+]([O-])=O)[N+]([O-])=O	71.31	101
N-(2,2-dinitrobutyl)-N-2,2-trinitro-1-butanamine	C8H14N6O10	CCC([N+]([O-])=O)([N+]([O-])=O)CN(CC([N+]([O-])=O)([N+]([O-])=O)CC)[N+]([O-])=O	70.21	80
2-[nitro(2,2,2-trinitroethyl)amino]ethyl nitrate	C4H6N6O11	C(CO[N+](=O)[O-])N(CC([N+](=O)[O-])([N+](=O)[O-])[N+](=O)[O-])[N+](=O)[O-]	84.68	7
N-methyl-N-(2-nitramidoethyl)nitramide	C3H8N4O4	CN(CCN[N+](=O)[O-])[N+](=O)[O-]	82.92	114
Trinitroethyl-2-methoxy-ethylnitramine	C5H9N5O9	O=[N+]([O-])N(C([N+]([O-])=O)([N+]([O-])=O)C[N+]([O-])=O)CCOC	90.3	42
Nitromethane	CH3NO2	C[N+](=O)[O-]	5.92	320
N-methyl-N-nitroformamide	C2H4N2O3	CN(C=O)[N+](=O)[O-]	21.12	320

## Sheet: Table S5
Table S5 The chemical name, molecular formula, isomeric SMILES, phonon-vibron coupling coefficients(ζ×104) and impact sensitivity(H50) of group B energetic materials.
Chemical name	Molecular formula	Isomeric SMILES	Phonon-vibron coupling coefficients(ζ×104)	Impact sensitivity(H50)
1,3,5-Triamino-2,4,6-trinitrobenzene	C6H6N6O6	O=[N+](C1=C(N)C([N+]([O-])=O)=C(N)C([N+]([O-])=O)=C1N)[O-]	46.28	490
1,3-diamino-2,4,6-trinitrobenzene	C6H5N5O6	O=[N+](C1=C(N)C([N+]([O-])=O)=C(N)C([N+]([O-])=O)=C1)[O-]	59.32	320
1-Methyl-3,5-diamino-2,4,6-trinitrobenzene	C7H7N5O6	O=[N+](C1=C(C)C([N+]([O-])=O)=C(N)C([N+]([O-])=O)=C1N)[O-]	90.87	239
2,4,6-Trinitroaniline	C6H4N4O6	C1=C(C=C(C(=C1[N+](=O)[O-])N)[N+](=O)[O-])[N+](=O)[O-]	101.14	177
1,3-Dimethoxy-2,4,6-trinitrobenzene	C8H7N3O8	O=[N+](C1=C(OC)C([N+]([O-])=O)=C(OC)C([N+]([O-])=O)=C1)[O-]	79.32	251
2,4,6-trinitrotoluene	C7H5N3O6	CC1=C([N+]([O-])=O)C=C([N+]([O-])=O)C=C1[N+]([O-])=O	88.42	160
1,4-dipicrylpyrazole	C15H6N8O12	[O-][N+](C1=CC([N+]([O-])=O)=CC([N+]([O-])=O)=C1C2=CN(C3=C([N+]([O-])=O)C=C([N+]([O-])=O)C=C3[N+]([O-])=O)N=C2)=O	71.17	314
1-picrylimidazole	C9H5N5O6	[O-][N+](C1=CC([N+]([O-])=O)=CC([N+]([O-])=O)=C1N2C=CN=C2)=O	62.08	314
N-(5-nitro-1,3,5-triazinan-2-ylidene)nitramide	C3H6N6O4	O=[N+](/N=C1NCN([N+]([O-])=O)CN\1)[O-]	105.51	80
N,N'-dimethyl-N,N'-dinitrooxamide	C4H6N4O6	O=C(N(C)[N+]([O-])=O)C(N(C)[N+]([O-])=O)=O	125.29	79
bis-(2,2-dinitropropyl)-carbonate	C7H10N4O11	O=C(OCC([N+]([O-])=O)([N+]([O-])=O)C)OCC([N+]([O-])=O)([N+]([O-])=O)C	80.49	300
2-methyl-1-nitropropyl 4,4,4-trinitrobutanoate	C8H12N4O10	O=C(OC([N+]([O-])=O)C(C)C)CCC([N+]([O-])=O)([N+]([O-])=O)[N+]([O-])=O	78.03	279
5,5,5-trinitropentan-2-one	C5H7N3O7	CC(CCC([N+]([O-])=O)([N+]([O-])=O)[N+]([O-])=O)=O	103.11	125
2,2-dinitro-1,3-propane-diol	C3H6N2O6	OCC([N+]([O-])=O)([N+]([O-])=O)CO	112.92	110
N-(t-butyl)-trinitroacetamide	C6H10N4O7	O=C(NC(C)(C)C)C([N+]([O-])=O)([N+]([O-])=O)[N+]([O-])=O	110.19	110

## Sheet: Table S6
Table S6 The computed frequencies (cm–1) in 0-700cm-1 for group A energetic materials.															Table S4 The computed frequencies (cm–1) of phonon and molecule for B group energetic materials.
C12H4N8O10	C7H4N8O6	C8H5N7O6	C7H6N4O6	C7H5N3O7	C6N8O10	C18H6N12O12	C8H4N6O6	C7H5N5O7	C8H7N3O7	C7H5N3O6	C7H5N3O7	C18H6N12O12	C6H4N2O6	C10H7N5O12	C4H4N6O6	C2H2N4O2	C10H12N4O8	C22H9N15O20	C5H8N4O7	C8H10N4O12	C7H9N5O12	C8H11N5O12	C8H12N6O11	C8H14N6O10	C4H6N6O11	C3H8N4O4	C5H9N5O9	C2H4N2O3	CH3NO2
22.56	31.6	37.21	47.5	48.7	22.72	12.62	39.88	32.94	37.76	27.85	44.65	29.96	39.27	20.57	42.81	67.25	33.77	8.87	41.81	12.99	13.19	18.08	7.33	20.85	21.1	37.3	37.56	37.63	15.39
25.06	47.42	44.35	51.3	52.94	36.33	20.15	42.97	60.74	47.46	40.5	51.37	37.22	73.82	24.43	67.65	207.75	36.2	13.61	48.86	27.73	25.13	21.13	25.42	33.99	23.77	51.61	38.76	178.06	476.8
26.72	50.59	52.37	62.72	58.24	37.64	20.16	48.39	70.21	53.6	42.93	56.85	49.03	114.41	25.51	74.49	222.76	37.34	17.03	57.28	33.45	29.24	28.13	28.99	44.88	35.38	61.26	41.94	218.74	593.48
29.08	54.2	65.35	89.2	62.29	49.74	29.39	58.23	76.76	66.24	52.45	91.17	49.67	130.06	42.78	84.97	424.49	40.13	19.08	60.58	37.89	35.6	38.31	37.78	51.87	42.31	95.14	61.54	233.28	648.98
48.18	80.25	85.91	105.62	93.94	58.07	33.37	78.91	77.74	74.45	80.75	102.05	50.32	201.84	47.52	93.93	524.6	116.99	20.99	89.89	48.13	37.93	48.74	43.06	58.45	55.92	113.19	70.18	258.72
49.66	87.6	93.31	134.41	124.92	72.16	48.07	90.99	113.03	108.51	104.92	132.89	54.84	238.67	50.93	143.12	600.43	119.43	33.38	108.51	54.54	47.07	50.68	52.5	70.57	73.67	134.62	75.99	369.51
51.97	117.07	104.99	186.47	148	80.16	49.35	104.12	124.02	120.58	164.07	168.26	68.24	281.46	56.15	161.87	648.13	139.76	34.97	143.58	59.9	48.81	54.05	59.91	81.33	84.47	150.87	83.89	462.64
70.37	135.76	119.97	203.97	171.67	84.49	50.99	145.96	128.89	143.63	174.08	206.03	71.7	327.54	62.13	202.48		142.41	37.53	154.02	60.89	75.18	61.9	63.32	92.01	92.14	273.78	101.59	559.04
80.2	164.22	172.75	221.81	176.92	113.64	55.88	170.16	165.02	152.83	241.94	219.01	76.68	353.77	81.2	216.79		144.35	43.19	187.36	77.01	80.43	68.82	74.22	104.51	105.16	310.06	116.88	687.25
109.64	186.3	192.07	252.47	199.61	126.17	66.46	174.19	175.63	175.01	262.25	256.69	82.16	383.01	95.05	300.57		218.23	47.48	208.51	86.01	92.04	79.05	82.14	106.26	116.74	317.92	142.65
114.31	191.15	207.8	300.36	244.47	150.9	74.78	187.37	200.94	197.22	322.26	281.44	97.48	415.51	114.07	327.09		225.12	50	219.59	92.18	98.93	82.62	97.9	121.85	134.72	379.33	173.82
124.43	224.11	259.34	327.68	275.08	160.32	76.01	257.29	214.17	253.2	332.07	321.63	109.54	444.79	123.58	422.97		225.89	53.61	226.82	136.08	127.33	105.85	116.27	126.81	156.46	410.56	180.06
139.98	271.98	266.78	334.15	308.08	176.55	76.21	287.29	255.52	264.46	391.1	325.84	126.43	460.27	150.2	449.62		294.19	64.94	245.39	151.47	154.46	120.37	144.66	153.89	169.43	465.58	182.93
152.3	291.52	311.3	355.36	321.54	179.69	89.9	312.3	273.66	292.66	406.23	357.63	137.1	493.59	154.54	451.65		312.3	73.9	272.06	165.69	159.67	149.52	161.84	158.42	182.19	597.97	227.79
166.44	323.85	327.95	370.61	337.91	189.78	108.69	330.8	275.79	311.16	429.3	379.28	147.53	579.37	171.44	469.42		315.34	75.54	305.58	172.48	176.93	159.48	166.73	168.56	195.76	603.57	230.65
173.18	338.19	339.77	405.35	363.32	194.38	118.63	342.37	300.95	322.07	505.45	414.36	151.52	608.09	179.87	532.38		318.44	76.51	334.19	184.44	186.58	179	181.64	189.3	226.84	676.87	235.39
199.67	360.44	351.21	418.96	396.11	214.48	124.62	372.06	331.72	346.17	520.62	427.28	160.32	629.25	186.46	536.75		347.49	80.32	340.43	211.13	191.24	181.99	188.11	189.69	238.63		257.03
211.25	384.59	390.29	447.68	417.77	252.57	149.28	414.89	351.81	363.03	562.78	453.59	165.8	654.25	228.64	591.56		348.1	82.86	345.93	222.42	237.47	192.52	196.49	200.66	252.71		305.45
241.98	410.35	405.73	488.99	524.23	254.21	153.67	487.66	359.72	417.79	588.24	477.32	171.17	695.92	233.4	639.88		363.92	92.36	377.11	238.89	244.07	207.14	203.86	220.89	319.88		322.23
286.29	444.06	420.22	502.42	534.12	270.61	157.23	524.01	388.86	472.06	661.57	513.98	172.78		239.56	678.11		391.25	97.51	394.04	241.93	255.13	210.65	221.3	225.41	339.79		343.82
306.83	512.98	468.47	571.06	549.64	274.83	166.07	537.16	401.63	496.27	675.75	579.83	182.46		276.28	697.84		403.16	102.78	447.81	258.96	277.2	237.47	244.07	241.58	358.77		369.73
312.95	531.07	502.09	591.77	620.46	290.9	172.52	595.78	449.76	530.26		642.51	222.4		288.31			437.42	113.69	508.15	293.54	300.59	265.08	250.55	258.89	362.68		384.93
325.11	556.66	576.62	648.77	678.04	304.36	173.36	617.68	458.34	545.41		661.92	225.84		317.78			466.3	117.8	558.16	310.52	305.62	299.64	293.77	309.34	392.49		402.33
335.41	584.11	600.3	659.26		349.54	185.36	623.32	491.32	636.21		688.94	250.35		322.72			496.35	123.43	574.53	319.23	314.92	309.29	300.14	319.4	424.14		439.68
346.79	624.92	613.23	685.49		390.72	214.88	686.37	523.4	672.95			253.15		324.24			522.86	125.43	607.67	320.31	326.08	340.77	310.46	329.91	428.68		467.72
354.96	673.24	621.11			432.63	229.63		586.13				298.4		327.32			540.71	134.05	664.73	333.2	356.14	349.57	334.2	333.06	518.09		541.48
371.11	695.1	651.48			485.22	247.28		611				307.89		359.28			542.62	143.89	679.52	367.64	367.27	350.33	350.09	352.73	555.55		568.63
401.19		684.49			497.44	272.84		642.18				311.71		369.06			585.71	146.88		375.14	375.32	356.87	358.45	360.38	582.4		607.42
426.21		693.38			505.36	290.9		653.61				312.13		408.58			684.73	155.38		388.2	395.74	370.25	362.64	367.55	624.4		618.05
445.41					548.7	310.37		690.38				333.66		417.86			690.94	156.95		408.11	411.86	377.35	394.61	426.03	631.94		682.6
485.77					651.6	312.18						335.37		432.34				163.02		416.03	474.53	401.74	407.83	430.82	662.31
505.49					680.19	313.37						345.79		453.17				180.67		442.53	503.19	436.03	428.28	440.01	679.4
524.72						333.23						365.38		491.49				186.61		484.24	512.27	464.61	476.7	489.65
534.48						336.35						366.67		528.12				188.65		499.52	558.42	486.37	488.94	491.85
567.56						346.48						379.86		549.29				192		542.51	573.87	527.74	519.09	552.47
572.85						368.18						388.43		560.08				197.82		572.73	617.48	542.68	548.04	559.26
605.67						369.92						420.53		593.73				202.55		600.85	626.68	578.09	571.03	591.22
637.83						377.98						422.3		597.8				203.52		637.42	646.48	618.52	602.33	613.34
654.86						404.5						433.83		617.22				228.06		686.55	674.4	629.17	621.14	650.45
673.79						414.29						436.66		677.88				251.23				650.37	648.07	680.08
						417.81						449.2						264.31					652.93
						431.34						493.69						271.04					692.22
						438.29						495.9						289.73
						447.94						526.48						300.44
						481.75						527.58						313.77
						500.12						542.91						316.82
						525.62						545.91						320.6
						527.98						598.57						322.91
						539.87						599.17						327.58
						554.71						614.59						333.18
						600.59						619.23						342.4
						602.95						644.38						349.34
						612.99						648.66						353.94
						623.87												359.93
						642.02												370.79
						651.23												374.08
																		376.26
																		396.13
																		399.96
																		402.27
																		430.05
																		448.87
																		454.35
																		467.94
																		500.19
																		506.14
																		508.96
																		528.66
																		531.45
																		532.81
																		533.99
																		540.4
																		544.7
																		567.64
																		594.47
																		621.88
																		628.8
																		639.77
																		652.01
																		659.19
																		664.15
																		673.75
																		681.48
																		695.26

## Sheet: Table S7
Table S7 The computed frequencies (cm–1) of 0-700cm-1 for group B energetic materials.
C6H6N6O6	C6H5N5O6	C7H7N5O6	C6H4N4O6	C8H7N3O8	C7H5N3O6	C15H6N8O12	C9H5N5O6	C3H6N6O4	C4H6N4O6	C7H10N4O11	C8H12N4O10	C5H7N3O7	C3H6N2O6	C6H10N4O7
32.54	42.72	48.09	44.76	45.44	48.22	14.89	39.36	25.45	43.96	14.88	19.7	21.52	48.71	43.39
33.13	57.19	49.85	53.66	49.51	50.81	17.35	42.36	57.29	59.87	15.35	26.12	26.53	72.55	50.85
52.46	60.57	72.68	57.55	53.14	54.23	20.85	48.27	82.37	80.15	26.25	33.75	42.22	138.87	58.46
70.3	93.52	85.66	96.47	63.27	91.48	33.84	50.34	133.42	100.31	35.87	35.75	53.13	162.86	85.8
96.37	108.21	96.44	123.41	67.1	114.71	39.95	73.69	155.39	146.49	47.05	38.57	87.03	192.93	113.94
96.68	142.7	111.43	155.08	87.73	145.85	48.25	82.87	195.97	156.41	51.83	49.24	99.79	200.01	122.17
97.36	194.09	178.66	202.83	107	165.15	49.18	101.67	227.6	166.72	59.18	63.86	124.88	234.47	139.21
281.16	255.94	219.17	213.03	123.77	175.06	50.59	144.06	265.89	177.17	61.95	82.14	163.06	280.78	150.44
281.47	276.36	225.33	316.69	159.94	192.42	61.06	162.57	314.87	178.83	65.19	86.08	177.86	295.22	180.07
301.16	319.41	259.21	331.52	162.3	281.11	69.09	170.63	342.39	229.5	102.74	93.33	183.65	363.73	202.25
301.38	329.94	272.51	341.25	177.13	313.03	84.46	186.79	407.36	242.73	138.93	118	186.52	369.09	214.92
347.84	351.45	291.63	350.66	206.52	325.31	88.26	257.34	491.63	300.51	154.51	160.51	249.7	430.49	228.58
347.88	376.6	341.56	379.35	224.38	345.04	92.16	278.53	529.04	316.12	173.07	181.24	288.2	459.54	241.19
370.66	379.4	344.48	405.16	242.16	357.43	106.47	311.58	574.55	337.8	183.45	181.97	291.57	563.1	275.67
390.81	426.29	360.19	457.55	264.72	382.92	128.71	323.8	614.6	353.05	210.36	188.74	350.51	574.28	304.67
418.33	426.49	374.85	477.05	274	453.18	145.32	338.88	669.13	368.73	239.27	204.2	368.43	675.92	327.22
442.51	462.11	423.29	532.46	294.8	468.21	148.91	366.14		459.24	245.9	229.45	397.44	683.32	348.12
442.89	479.76	428.81	539.28	305.37	526.76	157.53	419.08		478.62	254.97	241.12	405.37		353.73
482.71	505.02	438.08	622.71	322.15	533.17	161.79	489.74		566.7	260.74	256.7	496.31		362.26
506.16	642.21	477.23	646.57	357.81	641.65	169.05	523.04		600.21	288.84	301.08	527.6		370.41
506.21	657.97	503.3	687.31	399.07	647.66	173.59	536.08			301.64	307.5	556.27		384.29
608.91	658.56	555.35		408.24	694.74	196.73	590.19			310.1	310.46	604.91		390.78
646.95	674.34	591.78		457.02		210.07	615.86			326.4	320.26	640.48		420.69
647.1	679.74	614.08		499.47		269.47	622.36			348.61	341.94			451.41
684.44	682.35	626.4		548.66		291.72	645.83			363.89	354.76			482.23
697.1		632.09		609.68		294.1				367.87	363.62			540.64
697.33		654.58		623.25		309.3				415.16	364.63			573.83
		685.96		667.83		311.1				417.62	400.29			584.54
		689.97		692.68		315.77				481.82	425.36			655.06
		694.6				336.21				493.6	471.67			682.75
						344.5				528.17	508.66
						350.98				544.97	515.33
						368.47				582.91	577.68
						372.69				627.4	615.75
						417.03				653.99	632.84
						452.02				675.53	656.69
						472.82					693.34
						493.31
						521.12
						527.12
						533.12
						546.87
						563.63
						603.18
						627.64
						631.73
						651.02
						671.78
